# Supplementary material for: A multilayer network model of neuron-astrocyte populations in vitro reveals mGluR5 inhibition is protective following traumatic injury
Source: PubMed Central journal article supplement (PMC9208011; doi:10.1162/netn_a_00227), 2022-06-01
Supplement: netn-06-499-s001.pdf [file netn-06-499-s001.pdf]

# Supporting Information for A multilayer network model of neuron-astrocyte populations in vitro reveals mGluR<sub>5</sub> inhibition is protective following traumatic injury

Margaret E. Schroeder<sup>1</sup>, Danielle S. Bassett<sup>1,2,3,4,5</sup>,

and David F. Meaney<sup>1</sup>

## SUPPORTING INFORMATION

### A. Automated detection of neuron and astrocyte calcium events

Astrocyte calcium events are extremely complex, and there is no stereotypical astrocyte calcium transient, as there is for a neuronal calcium transient or action potential (Bazargani and Attwell (2016); Khakh and McCarthy (2015); Wang et al. (2018, 2017)). The spatial and temporal heterogeneity of astrocyte calcium signals impedes their identification and quantification. Nevertheless, to fully understand neuron-astrocyte signaling, astrocyte Ca<sup>2+</sup> must be directly observed. We aimed to develop a robust quantitative algorithm for differentiating neuron and astrocyte calcium signals and counting astrocyte calcium events. As with neurons, while some information is lost when a calcium trace is converted to an event train, binarization reduces the complexity of the data and the subsequent computational load. Furthermore, event binarization enables calculation of metrics such as event rate, synchronization, and functional connectivity.

There are several existing methods for the automatic identification of neural spikes from various acquisition modalities (Nenadic and Burdick (2005); Quiroga, Nadasdy, and Ben-Shaul (2004); Schultz, Kitamura, Post-Uiterweer, Krupic, and Häusser (2009)). Our group recently developed FluoroSNNAP, Fluorescence Single Neuron and Network Analysis Package, an open-source, interactive software developed in MATLAB for automatic quantification of single-cell and population-level calcium dynamics (Patel, Man, Firestein, and Meaney (2015)). FluoroSNNAP showed improved calcium transient detection with a template-based algorithm compared to peak-based or wavelet-based detection

24 methods. Subsequently, we chose to develop an analogous template-based algorithm for automated  
25 detection of astrocyte calcium transients. This automated event detection algorithm is integrated into a  
26 semi-automated pipeline for analyzing large amounts of calcium image data from mixed cell populations.  
27 Here we describe the development of this pipeline and demonstrate its utility in analyzing real astrocyte  
28 calcium data.

29 To generate the astrocyte analog of this neuronal spike detection algorithm, a library of representative  
30 astrocyte calcium event templates was curated from actual calcium activity of IF-confirmed astrocytes.  
31 Whole traces ( $n = 60$  traces, 180s each) considered to be representative of astrocyte activity were  
32 manually selected from the baseline imaging period of all imaged astrocyte segments ( $n = 5$  dishes,  $n =$   
33 125 segments). Traces were smoothed four times with a moving average filter using MATLAB's *smooth*  
34 function. Astrocyte calcium events were detected as local maxima in the scaled fluorescence of astrocyte  
35 ROIs. The full recording of each smoothed astrocyte calcium fluorescence trace was binned into 60s time  
36 windows. Local maxima in each time window were detected using MATLAB's *findpeaks* function,  
37 requiring a minimum peak height of 95% of the maximum in that time window, and a minimum distance  
38 between peaks of 2s. To prevent false detection of high-frequency, low-amplitude noise, the maximum  
39 peak height of each time window was required to be at least as high as the maximum peak of the full  
40 trace minus 0.2 in scaled fluorescence. Detected peaks were overlaid on their fluorescence traces and  
41 manually sorted. Only peaks that were correctly identified were retained for further analysis. Traces were  
42 then broken into snippets of fluorescence activity 1s preceding and following each peak, each snippet  
43 being 2s in length and containing one or a few peaks. Snippets were then manually shortened to capture a  
44 single peak from its beginning to 75% of its duration (Fig. 12A).

45 To generalize the waveform library to transients of various widths and heights, library snippets were  
46 scaled vertically and horizontally. Widths were scaled to a maximum of 4s and a minimum of 250ms, a  
47 reasonable range for the duration of astrocyte calcium transients. Heights were scaled to a maximum of  
48 the largest peak of all library traces, and a minimum of the smallest peak of all library traces. 18  
49 horizontal and 100 vertical scaling factors were generated by sampling evenly over the interval from  
50 minimum to maximum and normalizing to the mean. Traces were scaled vertically by multiplying the  
51 scaled fluorescence by the scaling factor. Horizontal scaling was accomplished by interpolating library  
52 traces over every range of horizontal scaling factors using MATLAB's *interp1* function with "pchip," a

53 shape-preserving piecewise cubic interpolation of the values at neighboring grid points. A total of 1,800  
54 scaled versions were generated for 217 library waveforms.

55 The library of scaled astrocyte calcium waveforms was further pruned to minimize the error between  
56 library waveforms and unfiltered astrocyte calcium traces. First, peaks in the original 60 unfiltered scaled  
57 fluorescence traces were identified using the same algorithm as for filtered traces. 2s-snippets of  
58 unfiltered fluorescence data were created as described above. Mean squared error (MSE) between 280  
59 unfiltered snippets and 217 library snippets (each with 1,800 scaled versions) was calculated as a function  
60 of library trace identity and horizontal and vertical scaling factors, using MATLAB's *immse* function. For  
61 each of the 280 raw traces, the library trace and corresponding scaling factors that minimized MSE  
62 between the two was identified. After removing library waveforms that produced minimum MSE for only  
63 one unfiltered trace, 51 best library waveforms remained. MSE calculations were repeated using only  
64 these waveforms. To identify the best, as determined by lowest MSE, of these 51 repeated library  
65 waveforms, we set a requirement that a library waveform be represented as the best trace for at least two  
66 unfiltered traces. The number of variations in vertical and horizontal scaling factors for each waveform  
67 was set to equal the number of times it resulted in the minimum MSE for a trace. For example, if a  
68 library waveform produced the best fit for three traces, it was scaled three times and represented three  
69 times in the library. This method produced a total of 280 scaled library waveforms generated from 51  
70 parent waveforms, each scaled two or more times.

This library of curated astrocyte waveforms was used as templates in a previously developed  
template-matching algorithm for neuronal event detection ([Patel et al. \(2015\)](#)). Algorithm parameters  
were adjusted for analysis of astrocyte, rather than neuron, calcium dynamics. Briefly, this algorithm  
works as follows. Background fluorescence for all time points is estimated by interpolating from a linear  
fit to the average background fluorescence, to account for fluctuations in background. Background noise  
is calculated as five times the standard deviation of the output from a high-pass (order 15, 200 Hz cutoff)  
Butterworth filter applied to background fluorescence, divided by the mean of the background  
fluorescence. The raw fluorescence trace is scaled by background fluorescence for subsequent  
processing. To calculate the signal-to-noise ratio (SNR), noise is defined as one standard deviation above  
or below the mean scaled fluorescence. To estimate noise, the instantaneous standard deviation of the  
signal is calculated for 11 different time windows. The SNR in each time window is calculated as the

99th percentile of the instantaneous signal standard deviation divided by the 1st percentile of the instantaneous standard deviation. Overall SNR is defined as the standard deviation of the SNR in each time window (Eq. 1).

$$SNR = \sqrt{\frac{1}{N-1} \sum_{i=1}^N \left( \frac{\sigma_{.99,i}}{\sigma_{0.01,i}} - \frac{\overline{\sigma_{.99,i}}}{\overline{\sigma_{0.01,i}}} \right)^2}, \quad (1)$$

71 where  $N$  is the number of time windows,  $\sigma_{0.01,i}$  is the 1st percentile of the instantaneous standard  
 72 deviation of the  $i$ th time window, and  $\sigma_{0.99,i}$  is the 99th percentile of the instantaneous standard deviation  
 73 of the  $i$ th time window. If the SNR is below 1.5, the signal is deemed too low for event detection.  
 74 Otherwise, the SNR is used to set the threshold for minimum peak level in subsequent peak detection.  
 75 To proceed with event detection, each library snippet is slid along the length (in time) of the calcium  
 76 signal and the Pearson's linear correlation coefficient is calculated at each time point. To eliminate the  
 77 potential of high correlation between the library waveform and noise, only the correlation of time points  
 78 where the signal exceeded background noise is recorded. The correlation matrix is then passed through a  
 79 median filter with a neighborhood size of five. The instantaneous correlation for every library waveform  
 80 is collapsed into an overall probability of an event (henceforth spike, for illustrative purposes) occurring  
 81 over all waveforms. Only filtered correlation values above a certain threshold, or below the negative of  
 82 the threshold, are counted in the high probability and low probability calculations. The high and low  
 83 spike probability signals are filtered twice more using a 1D median filter with three neighbors and a  
 84 zero-phase digital filter, and averaged over all library waveforms.

85 Local maxima in the high and low probability signals are detected, and the mean and maximum value of  
 86 these peaks in probability are used to create a threshold for further peak detection to avoid false detection  
 87 of noisy peaks. The algorithm then checks that each peak in the high probability of spike signal is  
 88 followed and preceded by a peak in the low probability of spike signal. The fine-grained spike time  
 89 determined to be the first maximum of the gradient of the peaks in the high probability signal. The final  
 90 step in event detection is manual elimination of falsely identified peaks. Scaled fluorescence traces with  
 91 detected peaks overlaid are manually inspected by a user. To simplify the analysis protocol, if the  
 92 majority of the automatically detected peaks are incorrect, the ROI is eliminated from further analysis.

To validate our event detection algorithm, we assessed its performance on 10 recordings from five different isolations, each with one dish and two conditions. We recorded the number of correctly

identified events, falsely identified events, and true events. The sensitivity and specificity of event detection were calculated for each trace (Eqs. 2 & 3).

$$\text{Sensitivity} = \frac{TP}{TP + FN}, \quad (2)$$

and

$$\text{Specificity} = \frac{TN}{TN + FP}, \quad (3)$$

93 where  $TP$  is the number of true events correctly identified,  $FN$  is the number of true events missed,  $TN$   
 94 is the number of windows that were correctly identified as not having an event, and  $FP$  is the number of  
 95 windows incorrectly identified as having an event.

96 To test the performance of the astrocyte event detection algorithm on fluorescence traces that were not  
 97 used to generate the library, we assessed its performance on 10 recordings from five different isolations,  
 98 each with one dish and two conditions. The signal-to-noise ratio for all astrocyte ROIs in four of these  
 99 recordings fell below the threshold for event detection. A total of 78 astrocyte traces in the remaining six  
 100 recordings from four dishes were manually inspected. We recorded the number of correctly identified  
 101 events, falsely identified events, and true events for each trace. We used recording identification as a  
 102 pooling variable when averaging sensitivity and specificity to avoid bias towards recordings with more  
 103 traces (more active astrocyte segments). Mean sensitivity of all recordings was 92.61% (95% CI: [0.90,  
 104 1.03]) and mean specificity was 96.35% (95% CI: [0.85, 1.00]).

### 105 ***B. A functional assay to differentiate neurons and astrocytes***

106 Neurons and astrocytes respond differently to the application of N-Methyl-D-aspartic acid or  
 107 N-Methyl-D-aspartate (NMDA). NMDA, an amino acid derivative, is a specific NMDA receptor  
 108 (NMDAR) agonist that mimics the action of glutamate, the endogenous NMDAR ligand. Unlike  
 109 glutamate, NMDA is specific to NMDARs and does not activate other glutamate receptors that may be  
 110 present on neurons and astrocytes. Evidence of functional NMDAR expression in cultured cortical  
 111 astrocytes is insufficient to confirm existence (Dzamba, Honsa, and Anderova (2013)). Regardless of  
 112 expression level, as observed here and in prior studies, NMDA does not directly excite  
 113 astrocytes, (Backus, Kettenmann, and Schachner (1989); Bowman and Kimelberg (1984); Kettenmann  
 114 and Schachner (1985); Nagai, Tsugane, Oka, and Kimura (2004)) but has an excitotoxic effect on

115 neurons, greatly increasing their activity. With this knowledge, we can classify cells that exhibit  
116 increased calcium event frequency after NMDA application as neurons, and those that are inactive or  
117 maintain their basal activity level as astrocytes. Below we describe an experiment we conducted to  
118 validate the use of NMDA as a functional terminal assay to distinguish between neurons and astrocytes in  
119 our cell culture model.

120 Primary cultures ( $n=5$ ) prepared as described in the Materials and Methods section were transduced with  
121 GCaMP6f on the CAG promoter at DIV 3 and imaged at 488nm, 50s exposure on DIV 7. Three minutes  
122 of baseline activity was recorded after a two-minute adjustment period on the stage. Cells were imaged  
123 immediately following addition of 100uM NMDA + 1uM glycine coagonist for up to five minutes.  
124 Calcium activity was extracted as described in the Materials and Methods (Fig. 9). Maximum  
125 fluorescence projections generated in ImageJ software (National Institutes of Health) were manually  
126 identified, with neuronal cell bodies and astrocyte microdomains segmented as separate regions of  
127 interest (ROIs). Astrocyte segments were labeled using a custom MATLAB graphical user interface).  
128 The calcium activity of predicted astrocytes after NMDA application was examined and compared to that  
129 of a neuron (Fig. 12C-E). Predicted astrocyte ROIs that responded as a neuron would to NMDA  
130 application were reassigned as neurons.

131 Cells were fixed in 4% PFA and stained per the protocol described below for microtubule-associated  
132 protein 2 (MAP2, neurons; 1:1000 dilution for mouse-anti-MAP2 primary and donkey-anti-mouse  
133 secondary antibody) and GFAP (astrocytes; 1:500 dilution for rabbit-anti-GFAP primary antibody and  
134 1:1000 dilution for goat-anti-rabbit secondary antibody). DNA was stained with Hoechst at 10ug/mL.  
135 Immunofluorescent (IF) images were obtained at 405 (DNA), 561 (neurons), and 640 (astrocytes) nm. To  
136 verify that ROIs morphologically and functionally identified as astrocytes expressed GFAP, the same field  
137 of view as imaged under GCaMP6f was relocated during IF imaging.

138 Following the application of NMDA, neuronal event rate increased significantly by a mean of 16.89  
139 events per minute (Fig. 12E, Sidak's multiple comparisons test;  $t = 4.932$ ,  $df = 8$ ,  $p = 0.0003$ ). The effect  
140 of NMDA was easily identified by visual examination of single-cell and population activity (Fig. 12D).  
141 Importantly, the calcium activity of astrocytes was unaltered from baseline following addition of NMDA  
142 (mean difference = -1.493, Sidak's multiple comparisons test;  $t = 0.5897$ ,  $df = 8$ ,  $p = 0.8165$ ). After

143 sorting cells based on NMDA response, 100% of predicted astrocyte segments ( $n = 79$ ) and 96% of  
 144 neurons ( $n = 604$ ) were confirmed by IF staining ( $n = 5$  dishes).

145 **C. Calculation of pairwise correlation for adjacency matrices**

146 First, the background fluorescence, estimated from the mean fluorescence of 50 non-ROI regions in the  
 147 field of view, was subtracted from each ROI's fluorescence. The change in fluorescence was scaled to  
 148 background, and scaled change in fluorescence was filtered using an order 5, 0.5Hz lowpass Butterworth  
 149 filter, implemented in MATLAB. For a pair of ROIs  $x$  and  $y$  with time series  $x(t)$  and  $y(t)$ , the Pearson's  
 150 correlation coefficient (Eq. 4) was calculated over a set of time lags from -1s to 1s:

$$\rho_{xy} = \frac{N \sum x(t)y(t) - (\sum x(t) \sum y(t))}{\sqrt{[N \sum x(t)^2 - (\sum x(t))^2][N \sum y(t)^2 - (\sum y(t))^2]}}, \quad (4)$$

151 where  $N$  is the total number of time points and each sum is taken over  $N$ .

152 The maximum value of  $\rho_{xy}$  over all time lags was taken and compared to  $\rho_{xy}$  between  $x(t)$  and 100  
 153 surrogate traces  $y(t)$ , generated using the same AAFT algorithm described above, at the same lag as the  
 154 actual traces. We then calculated the  $Z$ -statistic for the maximum actual  $\rho_{xy}$  based on the distribution of  
 155  $\rho_{xy}$ 's generated using the surrogates, and converted it to a  $p$ -value based on the standard normal  
 156 distribution. The  $p$ -value is the probability that the observed  $\rho_{xy}$  came from a distribution of  $\rho_{xy}$ 's  
 157 between  $x(t)$  and a randomly permuted  $y(t)$  with the same frequency and amplitude spectra. If  $p$  was less  
 158 than 0.001,  $A_{xy}$ , the weight of the edge between astrocyte segments  $x$  and  $y$ , was set equal to the  
 159 maximum value of  $\rho_{xy}$ , and zero otherwise.

160 **D. Network Statistics**

Mean degree is the mean number of edges emerging from each node  $i$  to its neighbor  $j$ , or mean number  
 of other nodes to which each node is connected. It is defined mathematically as:

$$\langle K \rangle = \frac{1}{N} \sum_{i=1}^N \sum_{j=1}^N A_{ij}, \quad (5)$$

161 where  $A_{ij}$  is the binary weight between nodes  $i$  and  $j$ , and where  $N$  is the total number of nodes in the  
 162 network. A high value of  $\langle K \rangle$ , which we normalize to  $N$ , means that on average, nodes in the network  
 163 are connected to a large proportion of other nodes in the network.

Density is the ratio of the number of actual edges in the network to the total number of potential edges in the network. The number of potential edges in the network is proportional to the number of nodes: each node can be connected to each of the other nodes, but not itself. It is defined mathematically as:

$$\kappa = \frac{R}{N(N-1)}, \quad (6)$$

164 where  $R$  is the total number of edges in the network. Conceptually, density is an indicator of how  
 165 strongly connected the network is. A network with high density has strongly interconnected nodes, while  
 166 a network with low density has less strongly interconnected nodes.

Interlayer density was calculated as:

$$\kappa_{NA} = \frac{R_{NA}}{N_a * N_n}, \quad (7)$$

167 where  $R_{NA}$  is the number of edges between neuron and astrocyte nodes,  $N_a$  is the number of astrocyte  
 168 nodes, and  $N_n$  is the number of neuron nodes.  $\kappa_{NA}$  is in the range (0, 1) as in the intralayer case.

Nodal strength is similar to degree, but accounts for connection weight in weighted graphs. Nodal strength is the sum of the weights of all of a node's edges in a weighted network. Conceptually, strength can be thought of as a weighted degree. Mean nodal strength is defined mathematically as:

$$S(i) = \frac{1}{N-1} \sum_{j=1}^N W_{ij}, \quad (8)$$

169 where  $W_{ij}$  is the weighted connection between nodes  $i$  and  $j$ . In this work, we calculated the average  
 170 nodal strength over all nodes. It is important to normalize nodal strength by  $N-1$  because larger  
 171 networks have a greater number of weighted connections and therefore a higher upper bound for  $S$ . A  
 172 network with high normalized  $\langle S \rangle$  has many nodes with either many connections (high degree), a number  
 173 of strong connections (large weight values), or both, for its size. Conversely, a network with low  
 174 normalized  $\langle S \rangle$  has many nodes with either few connections (low degree), a number of weak connections  
 175 (low weight values), or both, for its size. Interlayer strength and density were calculated by summing the  
 176 weights, or number of nonzero values, of the edges between neurons and astrocytes. For a node in a given  
 177 layer, interlayer nodal strength was normalized by the number of nodes in the other layer, e.g.  $N_n$  for  
 178 nodes in the astrocyte layer, where  $N_n$  is the number of neurons.



Mean clustering coefficient is the mean ratio of the number of actual triangles around each node to the total number of potential triangles around each node. It measures how many sets of three nodes are fully interconnected, or where each of the three nodes is connected to the other two, and thus can be conceptualized as a local density measure. It is defined mathematically as:

$$\langle C \rangle = \frac{1}{N} \sum_{i=1}^N \frac{2u_i}{k_i(k_i - 1)}, \quad (9)$$

where  $k_i$  is the degree of node  $i$  and  $u_i$  is the number of triangles containing node  $i$ . The clustering coefficient is generalized to weighted networks by replacing the number of triangles  $u_i$  with the sum of triangle intensities (Onnela, Saramäki, Kertész, and Kaski (2005)). The averaged weighted clustering coefficient is calculated as:

$$\langle C \rangle = \frac{1}{N} \sum_{i=1}^N \frac{2}{k_i(k_i - 1)} \sum_{j,k} (\tilde{w}_{ij}\tilde{w}_{jk}\tilde{w}_{ki})^{1/3}, \quad (10)$$

179 where the weights are scaled by the largest weight in the network,  $\tilde{w}_{ij} = w_{ij}/\max(w_{ij})$ . Conceptually,  
 180 by this definition, a node's weighted clustering coefficient is the unweighted version renormalized by the  
 181 average intensity of triangles at that node. Here, we calculated the mean clustering coefficient,  $\langle C \rangle$ , in  
 182 each of our networks. A network with a high value of  $\langle C \rangle$  has a large proportion of fully connected  
 183 triangles, or high local density, while a network with a low value of  $\langle C \rangle$  has a small proportion of fully  
 184 connected triangles, or low local density.

Betweenness centrality is a measure of how many shortest path lengths pass through a given node. Conceptually, betweenness centrality measures the degree to which a node acts as a hub, facilitating many shortest-path connections between other nodes. It is defined as:

$$B_i = \frac{1}{(N - 1)(N - 2)} \sum_{h \neq j, h \neq i, j \neq i}^N \frac{l_{hj}(i)}{l_{hj}}, \quad (11)$$

185 where  $l_{hj}$  is the number of shortest paths between nodes  $h$  and  $j$ , and  $l_{hj}(i)$  is the number of shortest  
 186 paths between node  $h$  and node  $j$  that pass through node  $i$ . The shortest path length between nodes  $i$  and  
 187  $j$  is the minimum number of nodes that must be passed through to connect nodes  $i$  and  $j$ . For weighted  
 188 networks, betweenness centrality was calculated as above, using the weighted distance matrix, computed  
 189 using the BCT's distance\_wei function, which uses Dijkstra's shortest path algorithm. Brandes's  
 190 algorithm (Brandes (2001)) was used to compute centrality from the weighted distance matrix via the

191 BCT's *betweenness\_wei* function.  $\langle B \rangle$  is calculated as the mean  $B_i$  across all nodes in the network. We  
 192 divide by  $(N - 1)(N - 2)$  to normalize  $B_i$  to the range (0,1) prior to taking the mean across nodes, as is  
 193 customary, because a larger network has a greater number of shortest paths and therefore a larger upper  
 194 bound on  $\langle B \rangle$ . A network with a high value of normalized  $\langle B \rangle$  has a large proportion of nodes that act as  
 195 hubs, with several shortest paths passing through them, while a network with a small value of  $\langle B \rangle$  has a  
 196 low proportion of hub-like nodes.

Global efficiency is the inverse of the harmonic mean of the shortest path length between any two nodes. The name refers to the fact that a network with a high characteristic shortest path length will, under some specific assumptions of dynamics, be slower to transmit information from node  $i$  to node  $j$  than a network with many short paths between nodes. Networks with few long-distance connections typically have many large shortest path lengths. Reaching node  $j$  from node  $i$  in such a network requires many steps through other nodes, lessening its supposed efficiency. Global efficiency is defined as:

$$E = \frac{1}{N} \sum_{i=1}^N \frac{\sum_{i \neq j}^N d_{ij}^{-1}}{N - 1}, \quad (12)$$

197 where  $d_{ij}$  is the shortest topological distance between nodes  $i$  and  $j$ . Global efficiency of weighted  
 198 networks is calculated as above with  $d_{ij}$  being a weighted path length, calculated using Dijkstra's  
 199 algorithm in the BCT's *efficiency\_wei*. As described above, a network with a high value of  $E$  has many  
 200 long topological connections, a short characteristic pathlength, and is faster, under some specific  
 201 assumptions of the dynamics, to transmit information between any two nodes. Conversely, a network with  
 202 a low value of  $E$  has few long topological connections, a large characteristic pathlength, and is slower,  
 203 under some specific assumptions of the dynamics, to transmit information between any two nodes.

204 ***E. Contribution of relative abundance of neurons to multilayer network topology and community structure***

205 To determine the impact on micro- and macroscale multilayer topology of there being many more active  
 206 neurons than astrocyte segments, we sub-sampled the neuronal population so that neuron and astrocyte  
 207 layers were of equal size. For a multilayer network with  $n_a$  active astrocyte segments, we randomly  
 208 selected  $n_a$  neurons from the neuronal population and formed new adjacency matrices based on the  
 209 connectivity of the sub-population of neurons and the original population of astrocyte segments. Mean  
 210 nodal strength, degree, density, betweenness centrality, clustering coefficient, and global efficiency were

211 re-calculated for the half-neuron, half-astrocyte networks. Likewise, we re-ran community detection  
212 analysis and re-calculated the *ARI* and cell type module participation for balanced networks. Neuron  
213 layers were sub-sampled 30 times and the average measures over 30 iterations are reported. While this  
214 analysis is not biologically realistic, it is a useful statistical exercise to determine the impact of the  
215 relative abundance of active neurons in our cultures.

216 As was found for full-sized multilayer networks, strength in neuron and astrocyte layers was higher than  
217 interlayer strengths (Fig. S7A, Tukey's multiple comparisons test, N-N vs. N-A,  $q = 4.729$ ,  $p = 0.0039$ ,  
218  $df = 63$ ). Thus, as with full-sized multilayer networks, intralayer connections were stronger than  
219 interlayer connections. This finding suggests that the relative strength of intralayer connections compared  
220 to interlayer connections is not primarily driven by the greater abundance of neurons. As was found for  
221 actual multilayer networks, randomly sub-sampled multilayer networks with an equal number of neurons  
222 and astrocytes exhibited significantly larger clustering coefficient and lower global efficiency than their  
223 randomized counterparts (Fig. 7B), but were not different in betweenness centrality  $B$ . Topological  
224 measures  $C$ ,  $B$ , and  $E$  were similarly correlated with density in sub-sampled multilayer networks (Fig.  
225 S7C).

226 As was done for full-sized multilayer networks, we analyzed the impact of experimental manipulations  
227 on sub-sampled multilayer network topology using a generalized linear regression, with mean nodal  
228 strength as a regressor (Table S 7). In sub-sampled multilayer networks, no manipulation was a  
229 significant predictor of topology after controlling for multilayer strength. This finding suggests that  
230 injury-mediated changes in clustering coefficient are primarily driven by the relative abundance of  
231 neurons in our cultures. Furthermore, in sub-sampled multilayer networks, neither treatment with MPEP,  
232 injury, or their interaction was a significant predictor of multilayer or interlayer mean nodal strength at  
233 the final experimental time point (GLM with  $S$  as outcome variable and MPEP, Injury, MPEP + Injury  
234 interaction term, and event rate as covariates, all  $p$ -values from  $z$ -tests on coefficients above 0.05).

235 To assess the impact of the relative abundance of neurons in our cultures on community structure, we  
236 performed the same modularity detection on sub-sampled multilayer networks ( $\gamma_s = 1.13$ ,  $\gamma_f = 1.55$ ).  
237 The mean *ARI* between spatial and functional sub-sampled multilayer communities was significantly  
238 larger than for actual multilayer networks (mean for full multilayer = 0.05364, mean for sub-sampled  
239 multilayer = 0.1065, paired two-tailed  $t$ -test,  $t = 2.346$ ,  $df = 22$ ,  $p = 0.0284$ ). This disagreement between

240 spatial and functional partitioning was not driven by differences in community size, as  $\gamma$ , the spatial  
 241 tuning parameter, was adjusted to reduce this difference (Fig. S7D, paired  $t$ -test,  $t = 0.8896$ ,  $df = 22$ ,  $p =$   
 242  $0.3833$ ). The difference between actual and sub-sampled multilayer  $ARI$  may be due to differences in  
 243 overall network size, or higher disagreement between spatial and functional modularity in neuronal  
 244 layers. In sub-sampled multilayer networks, neurons and astrocyte segments participated equally in  
 245 spatial and functional modules (Fig. S7E). Thus, differences in module participation in full multilayer  
 246 networks reflects the dominance of neurons in quantity.

247 ***F. Community detection methodology***

The modularity quality function is given by:

$$Q = \sum_{ij} [A_{ij} - \gamma P_{ij}] \delta(c_i, c_j), \quad (13)$$

where  $Q$  measures quality,  $A_{ij}$  is the observed adjacency matrix,  $P_{ij}$  is the null model adjacency matrix, and  $\delta(c_i, c_j)$  is 1 when nodes  $i$  and  $j$  are in the same community and 0 otherwise. The parameter  $\gamma$  is a resolution parameter that governs the size and number of detected communities. The values of  $\gamma$  were 1.125 for spatial astrocyte graphs, 1.270 for functional astrocyte graphs, 1.05 for spatial neuron graphs, 1 for functional neuronal graphs, 1.13 for spatial multilayer graphs, and 1.55 for functional multilayer graphs. A Newman-Girvan (Newman and Girvan (2004)) null model was used for both functional and spatial graphs and it was implemented in a custom MATLAB script using Eqs. 14 - 16:

$$P_{ij} = \frac{s_i s_j}{2m}, \quad (14)$$

where

$$s_i = \sum_j A_{ij}, \quad (15)$$

and

$$m = \frac{1}{2} \sum_{ij} A_{ij}, \quad (16)$$

248 where  $s_i$  is the strength of node  $i$ , the sum of all its weights to other nodes.

249 The modularity quality function was maximized using a Louvain-like community detection algorithm.  
 250 Briefly, the Louvain algorithm is a greedy optimization algorithm wherein each nodes starts in its own  
 251 community, node community assignment is changed locally, and changes that increase modularity are

252 kept until there are no further increases in quality (Blondel, Guillaume, Lambiotte, and Lefebvre (2008);  
 253 Fortunato (2010); Mucha, Richardson, Macon, Porter, and Onnela (2010); Porter, Onnela, and Mucha  
 254 (2009)). The Louvain algorithm was iterated until the algorithm converged on the final module  
 255 assignment. Because the modularity landscape is rough, with many near-optimal solutions (Good,  
 256 De Montjoye, and Clauset (2010)), we assigned a node’s module to be the mode of its module  
 257 assignment over 50 optimizations.

For both single-layer and multilayer networks,  $\gamma$  was tuned separately and manually for spatially and functionally generated graphs to minimize the difference between the number of communities detected for spatial and functional networks. In addition to the value of  $Q$ , the Louvain algorithm outputs the partition  $g$ , a vector containing the community number of each node. The Adjusted Rand Index ( $ARI$ ) was used to measure the similarity of community partitions. It is defined mathematically as:

$$ARI = \frac{\binom{N}{2}(a + f) - [(a + b)(a + e) + (e + f)(b + f)]}{\binom{N}{2}^2 - [(a + b)(a + e) + (e + f)(b + f)]}, \quad (17)$$

258 where  $N$  is the total number of nodes,  $a$  is the number of pairs of nodes that are in the same community  
 259 in the functional partition,  $g_f$ , and the spatial partition,  $g_s$ ,  $b$  is the number of pairs of nodes that are in a  
 260 different community in  $g_f$  and  $g_s$ ,  $e$  is the number of pairs of nodes that are in the same subset in  $g_f$  and a  
 261 different subset in  $g_s$ , and  $f$  is the number of pairs of nodes that are in a different subset in  $g_f$  and the  
 262 same subset in  $g_s$ . For astrocytes,  $ARI$  was also calculated for  $g_a$ , the actual partitioning of astrocyte  
 263 segments into cells, versus  $g_f$  and  $g_s$ . The Adjusted Rand Index can be negative, indicating that the  
 264 partitions disagree more than what would be predicted by chance, and has a maximum of 1 for total  
 265 agreement.

### 266 ***G. Immunocytochemistry***

267 Cells were fixed in 4% paraformaldehyde (PFA) immediately following imaging and maintained in 1X  
 268 phosphate-buffered saline (PBS) until staining. Cell membranes were permeabilized with cold 0.2%  
 269 Triton X-100 in PBS for 5 min. Non-specific binding was blocked with 1% bovine serum albumin (BSA,  
 270 Sigma) and 2.5% normal goat serum (NGS) for 45 min at room temperature (RT). Primary antibodies  
 271 were incubated overnight at 4°C in diluted blocking solution (0.2% BSA and 0.5% NGS in PBS) at the  
 272 following concentrations: Mouse-anti-MAP2 (Millipore Sigma) at 1:750, Rabbit-anti-GFAP (Abcam) at

273 1:500. Following a wash with diluted blocking solution, secondary antibodies were incubated in diluted  
274 blocking solution for 45 min at RT at the following concentrations: Goat-anti-mouse Alexa Fluor 568  
275 (Thermo Fisher Scientific) at 1:1000 and Goat-anti-rabbit Alexa Fluor 633 (Thermo Fisher Scientific) at  
276 1:1000. After a second wash, anti-mGluR5 Alexa Fluor 488 (Novus Biologicals) was incubated at a  
277 concentration of 1:100. All antibody solutions were centrifuged at 15,000 rotations per minute (RPM) for  
278 10 min to remove aggregates. Following three rinses with PBS, stained cells were maintained under low  
279 light conditions until imaging. To stain for nuclei, 10 ug/mL Hoescht was applied during the final rinse  
280 step.

## REFERENCES

- 281 Backus, K., Kettenmann, H., & Schachner, M. (1989). Pharmacological characterization of the glutamate receptor in cultured  
282 astrocytes. *Journal of neuroscience research*, 22(3), 274–282.
- 283 Bazargani, N., & Attwell, D. (2016). Astrocyte calcium signaling: the third wave. *Nature neuroscience*, 19(2), 182.
- 284 Blondel, V. D., Guillaume, J.-L., Lambiotte, R., & Lefebvre, E. (2008). Fast unfolding of communities in large networks.  
285 *Journal of statistical mechanics: theory and experiment*, 2008(10), P10008.
- 286 Bowman, C., & Kimelberg, H. (1984). Excitatory amino acids directly depolarize rat brain astrocytes in primary culture.  
287 *Nature*, 311(5987), 656.
- 288 Brandes, U. (2001). A faster algorithm for betweenness centrality. *Journal of mathematical sociology*, 25(2), 163–177.
- 289 Dzamba, D., Honsa, P., & Anderova, M. (2013). Nmda receptors in glial cells: pending questions. *Current*  
290 *neuropharmacology*, 11(3), 250–262.
- 291 Fortunato, S. (2010). Community detection in graphs. *Physics reports*, 486(3-5), 75–174.
- 292 Good, B. H., De Montjoye, Y.-A., & Clauset, A. (2010). Performance of modularity maximization in practical contexts.  
293 *Physical Review E*, 81(4), 046106.
- 294 Kettenmann, H., & Schachner, M. (1985). Pharmacological properties of gamma-aminobutyric acid-, glutamate-, and  
295 aspartate-induced depolarizations in cultured astrocytes. *Journal of Neuroscience*, 5(12), 3295–3301.
- 296 Khakh, B. S., & McCarthy, K. D. (2015). Astrocyte calcium signaling: from observations to functions and the challenges  
297 therein. *Cold Spring Harbor perspectives in biology*, 7(4), a020404.
- 298 Mucha, P. J., Richardson, T., Macon, K., Porter, M. A., & Onnela, J.-P. (2010). Community structure in time-dependent,  
299 multiscale, and multiplex networks. *science*, 328(5980), 876–878.
- 300 Nagai, Y., Tsugane, M., Oka, J.-I., & Kimura, H. (2004). Hydrogen sulfide induces calcium waves in astrocytes. *The FASEB*  
301 *journal*, 18(3), 557–559.
- 302 Nenadic, Z., & Burdick, J. W. (2005). Spike detection using the continuous wavelet transform. *IEEE transactions on*  
303 *Biomedical Engineering*, 52(1), 74–87.
- 304 Newman, M. E., & Girvan, M. (2004). Finding and evaluating community structure in networks. *Physical review E*, 69(2),  
305 026113.
- 306 Onnela, J.-P., Saramäki, J., Kertész, J., & Kaski, K. (2005). Intensity and coherence of motifs in weighted complex networks.  
307 *Physical Review E*, 71(6), 065103.
- 308 Patel, T. P., Man, K., Firestein, B. L., & Meaney, D. F. (2015). Automated quantification of neuronal networks and single-cell

- 309 calcium dynamics using calcium imaging. *Journal of neuroscience methods*, 243, 26–38.
- 310 Porter, M. A., Onnela, J.-P., & Mucha, P. J. (2009). Communities in networks. *Notices of the AMS*, 56(9), 1082–1097.
- 311 Quiroga, R. Q., Nadasdy, Z., & Ben-Shaul, Y. (2004). Unsupervised spike detection and sorting with wavelets and  
312 superparamagnetic clustering. *Neural computation*, 16(8), 1661–1687.
- 313 Schultz, S. R., Kitamura, K., Post-Uiterweer, A., Krupic, J., & Häusser, M. (2009). Spatial pattern coding of sensory  
314 information by climbing fiber-evoked calcium signals in networks of neighboring cerebellar purkinje cells. *Journal of*  
315 *Neuroscience*, 29(25), 8005–8015.
- 316 Wang, Y., DelRosso, N. V., Vaidyanathan, T., Reitman, M., Cahill, M. K., Mi, X., . . . Poskanzer, K. E. (2018). An event-based  
317 paradigm for analyzing fluorescent astrocyte activity uncovers novel single-cell and population-level physiology.  
318 *bioRxiv*, 504217.
- 319 Wang, Y., Shi, G., Miller, D. J., Wang, Y., Wang, C., Broussard, G., . . . Yu, G. (2017). Automated functional analysis of  
320 astrocytes from chronic time-lapse calcium imaging data. *Frontiers in neuroinformatics*, 11, 48.



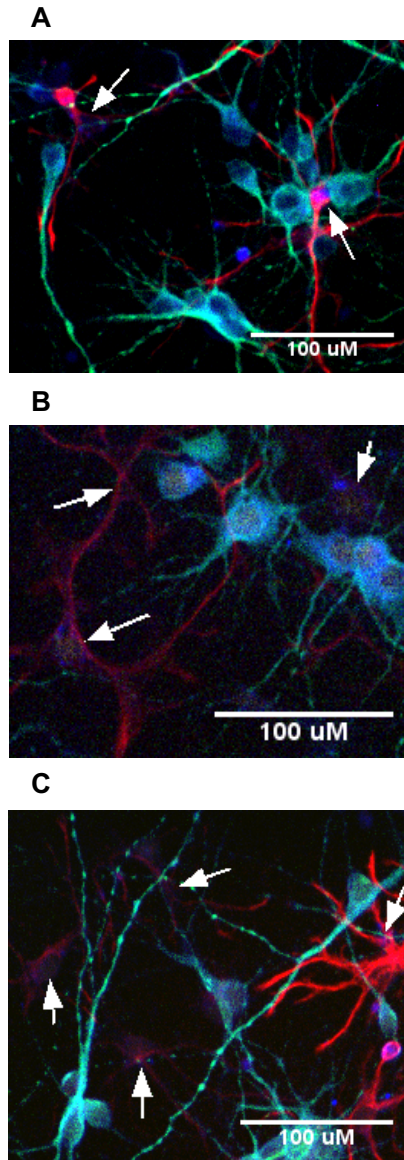

321 **Supplementary Figure 1.** Immunofluorescent staining confirms expression of mGluR<sub>5</sub> in neurons and astrocytes. Cells were stained for GFAP (red), an  
 322 astrocytic marker, MAP2 (green), a neuronal marker, and mGluR<sub>5</sub> (blue). Turquoise and magenta areas represent co-localization of mGluR<sub>5</sub> on neurons and  
 323 astrocytes, respectively. Shown in panels a - c are cropped fields of view from three dishes. Astrocytes expressing mGluR<sub>5</sub> are indicated with white arrows.

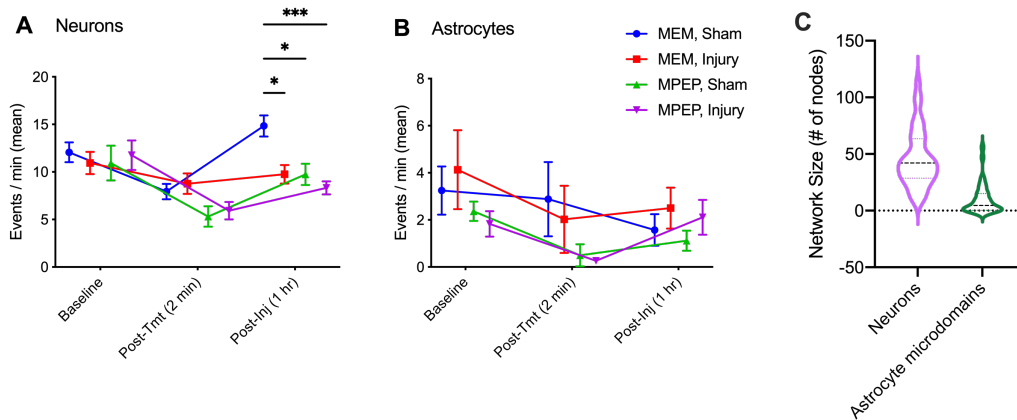

324 **Supplementary Figure 2.** Calcium activity and size of neuron-astrocyte cultures. **A-B.** mGluR<sub>5</sub> inhibition and injury decrease neuronal but not astrocytic  
 325 activity level. **A.** Neuronal event rate (events/min) at the three measured time points for all four treatment groups (n = 9 dishes for MEM/Sham and MEM/Inj,  
 326 n = 8 for MPEP/Sham, n = 10 for MPEP/Inj). **B.** Astrocytic event rate (events/min) at the three measured time points. Error bars indicate standard error of  
 327 the mean (SEM) and asterisks indicate statistical significance (\*p ≤ 0.05, \*\*p ≤ 0.01, \*\*\*p ≤ 0.001, \*\*\*\*p ≤ 0.0001). Tmt: treatment; MEM: treated with  
 328 minimum essential media; MPEP: treated with anti-mGluR<sub>5</sub>; Injury: subjected to targeted neuronal tap injury; Sham: negative injury control. **C.** Number of  
 329 active neurons (purple) or astrocyte microdomains (green) in each dish (95% of number of neurons [37.16, 54.34], 95% CI of number of astrocyte microdomains  
 330 [5.516, 14.43]). Violin plots show frequency distribution of the data, with dotted lines indicating median and quartiles.

|                              | Neuronal         |          |          | Astrocytic      |          |          |
|------------------------------|------------------|----------|----------|-----------------|----------|----------|
|                              | diff, 95% CI     | <i>q</i> | <i>p</i> | diff, 95% CI    | <i>q</i> | <i>p</i> |
| MEM, Sham vs. MEM, Injury    | [0.8790, 9.293]* | 4.470    | 0.0111   | [-4.518, 2.661] | 0.9619   | 0.9043   |
| MEM, Sham vs. MPEP, Sham     | [0.7588, 9.432]* | 4.345    | 0.0145   | [-3.269, 4.180] | 0.4549   | 0.9884   |
| MEM, Sham vs. MPEP, Injury   | [2.409, 10.61]*  | 5.869    | 0.0004   | [-3.940, 2.860] | 0.5908   | 0.9753   |
| MEM, Injury vs. MPEP, Sham   | [-4.327, 4.346]  | 0.007942 | >0.9999  | [-2.205, 4.973] | 1.434    | 0.7418   |
| MEM, Injury vs. MPEP, Injury | [-2.678, 5.524]  | 1.283    | 0.8010   | [-2.863, 3.639] | 0.4441   | 0.9892   |
| MPEP, Sham vs. MPEP, Injury  | [-2.820, 5.647]  | 1.235    | 0.8187   | [-4.396, 2.405] | 1.089    | 0.8677   |

331 **Supplementary Table 1.** Results of Tukey’s multiple comparisons test following a 2-way ANOVA on the effect of time and group assignment on neuronal  
332 and astrocytic event rate at the final experimental time point (one hour post-injury). For neuron event rate, the results of the 2-way ANOVA were as follows:  
333 Time x Group factor,  $F(6, 64) = 2.738$ ,  $p = 0.0197$ ; Time factor,  $F(2, 64) = 22.40$ ,  $p < 0.0001$ ; Group factor,  $F(3, 32) = 3.081$ ,  $p = 0.0412$ . For astrocyte event  
334 rate, the results of the 2-way ANOVA were as follows: Time x Group factor,  $F(6, 48) = 0.7730$ ,  $p = 0.5950$ ; Time factor,  $F(2, 48) = 3.265$ ,  $p = 0.0468$ ; Group  
335 factor,  $F(3, 24) = 1.604$ ,  $p = 0.2147$ . Asterisks indicate statistical significance.

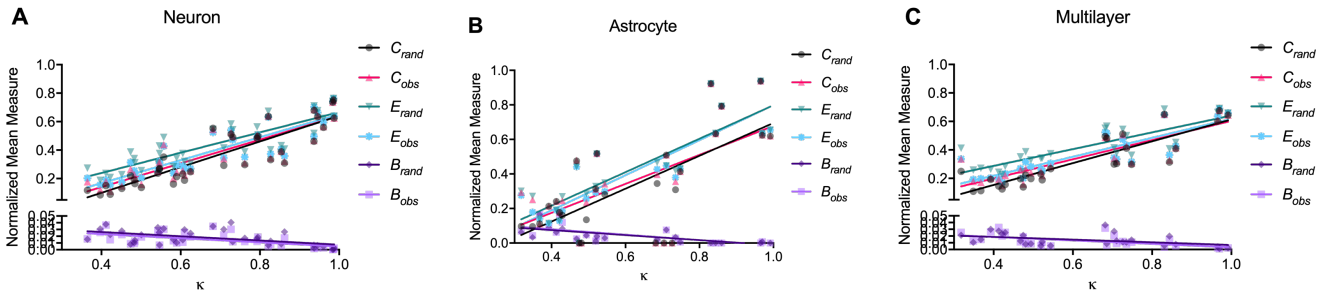

336 **Supplementary Figure 3.** Dependence of observed and randomized network topology on edge density. **A-C.**  $B$ ,  $C$ , and  $E$  vs network density  $\kappa$  for  
 337 observed (obs) and randomized (rand) networks at the final experimental time point (1 hour post-injury) for neuron-neuron **A**, astrocyte-astrocyte **B** and  
 338 multilayer networks **C**. See Fig. S2 for statistical details.

| <b>A. Neurons</b>      |                      |                      |                 |                  |                  |                  |
|------------------------|----------------------|----------------------|-----------------|------------------|------------------|------------------|
|                        | $B_{rand}$           | $B_{obs}$            | $C_{rand}$      | $C_{obs}$        | $E_{rand}$       | $E_{obs}$        |
| <b>95% CI of slope</b> | -0.04847 to -0.01428 | -0.04529 to -0.01631 | 0.7341 to 1.069 | 0.6659 to 0.9998 | 0.5650 to 0.8608 | 0.6591 to 0.9539 |
| $R^2$                  | 0.2904               | 0.3544               | 0.7791          | 0.7514           | 0.7383           | 0.7843           |
| <b>F</b>               | 13.92                | 18.67                | 119.9           | 102.7            | 95.91            | 123.6            |
| <b>DF</b>              | 34                   | 34                   | 34              | 34               | 34               | 34               |
| <b>p</b>               | 0.0007               | 0.0001               | <0.0001         | <0.0001          | <0.0001          | <0.0001          |

  

| <b>B. Astrocytes</b>   |                     |                     |                 |                 |                 |                 |
|------------------------|---------------------|---------------------|-----------------|-----------------|-----------------|-----------------|
|                        | $B_{rand}$          | $B_{obs}$           | $C_{rand}$      | $C_{obs}$       | $E_{rand}$      | $E_{obs}$       |
| <b>95% CI of slope</b> | -0.2226 to -0.06700 | -0.2359 to -0.07844 | 0.5367 to 1.366 | 0.4147 to 1.264 | 0.6867 to 1.251 | 0.7334 to 1.296 |
| $R^2$                  | 0.4298              | 0.4644              | 0.4719          | 0.3987          | 0.7085          | 0.7285          |
| <b>F</b>               | 15.07               | 17.34               | 22.34           | 16.58           | 51.05           | 56.34           |
| <b>DF</b>              | 20                  | 20                  | 25              | 25              | 21              | 21              |
| <b>p</b>               | 0.0009              | 0.0005              | <0.0001         | 0.0004          | <0.0001         | <0.0001         |

  

| <b>C. Multilayer</b>   |                       |                      |                  |                  |                  |                  |
|------------------------|-----------------------|----------------------|------------------|------------------|------------------|------------------|
|                        | $B_{rand}$            | $B_{obs}$            | $C_{rand}$       | $C_{obs}$        | $E_{rand}$       | $E_{obs}$        |
| <b>95% CI of slope</b> | -0.03650 to -0.003395 | -0.04029 to -0.01069 | 0.5965 to 0.9362 | 0.5049 to 0.8436 | 0.4294 to 0.7477 | 0.5048 to 0.8263 |
| $R^2$                  | 0.1977                | 0.3347               | 0.7755           | 0.729            | 0.6989           | 0.7442           |
| <b>F</b>               | 6.16                  | 12.58                | 86.35            | 67.24            | 58.02            | 72.74            |
| <b>DF</b>              | 25                    | 25                   | 25               | 25               | 25               | 25               |
| <b>p</b>               | 0.0201                | 0.0016               | <0.0001          | <0.0001          | <0.0001          | <0.0001          |

339 **Supplementary Table 2.** Results of linear regressions of  $B$ ,  $C$ , and  $E$  on network density  $\kappa$  for observed (obs) and randomized (rand) networks at the  
340 final experimental time point (1 hour post-injury, see Table S3). Reported are the 95% confidence interval on the slope, the  $R^2$  value, F-statistic, degrees of  
341 freedom (DF), and the p-value for neuron-neuron networks (**A**), astrocyte-astrocyte networks (**B**) and multilayer networks (**C**). For all network types, a stronger  
342 correlation was seen between  $B_{obs}$  and  $E_{obs}$  and  $\kappa$  than for  $B_{rand}$  and  $E_{rand}$  and  $\kappa$ , suggesting that these aspects of topology are more dependent  
343 on edge density for our networks than would be expected at random.

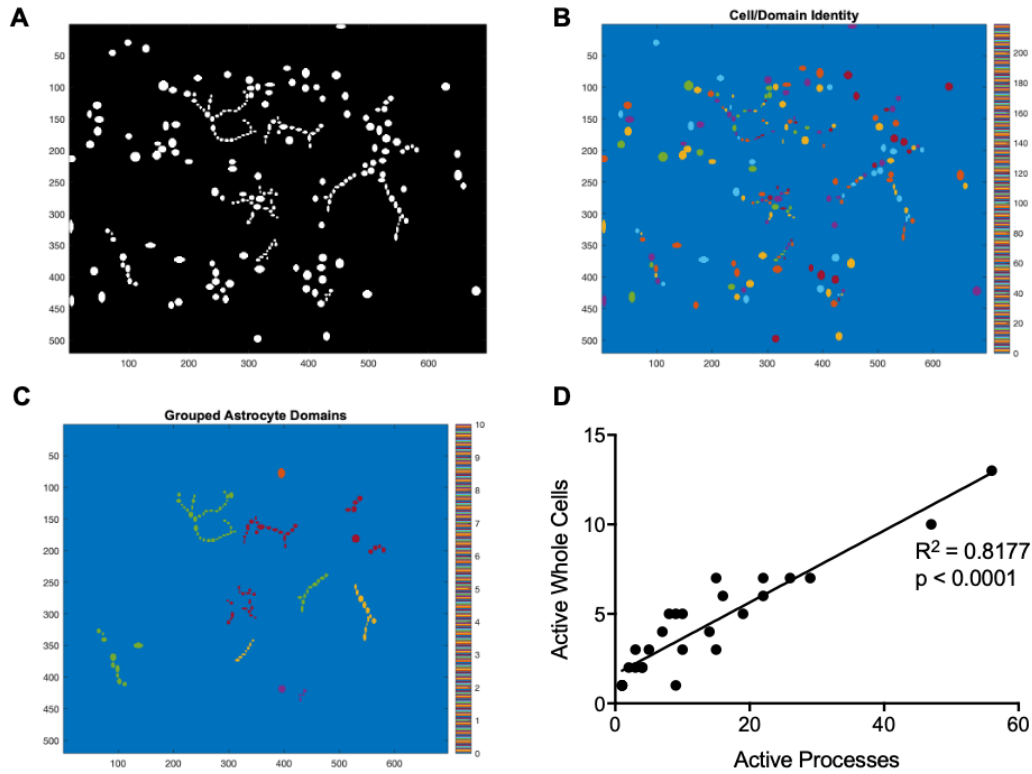

344 **Supplementary Figure 4.** Manual grouping of astrocyte microdomains. **A.** Binary segmentation mask used to extract continuous calcium signal for a  
 345 representative field of view. Neurons and astrocyte domains are indicated as nonzero (white) pixels. **B.** Mask colored by cell or astrocyte microdomain identity  
 346 (index 1-217), before grouping of astrocyte segments. **C.** Mask of astrocyte domains only, grouped by manually-identified cell using a custom-built astrocyte  
 347 identification graphical user interface (GUI). The GUI allows users to upload a segmentation file and click on predicted astrocyte segments to label them as such  
 348 for downstream image analysis. Users can remove falsely labeled astrocytes in the GUI. Duplicates are automatically removed. **D.** Number of active whole  
 349 astrocytes vs. number of active astrocyte microdomains (processes). As expected, there is significant correlation between the two (simple linear regression,  
 350 95% CI of slope [0.1681, 0.2336],  $R^2 = 0.8643$ ,  $F(1,25) = 159.3$ ,  $p < 0.0001$ ).

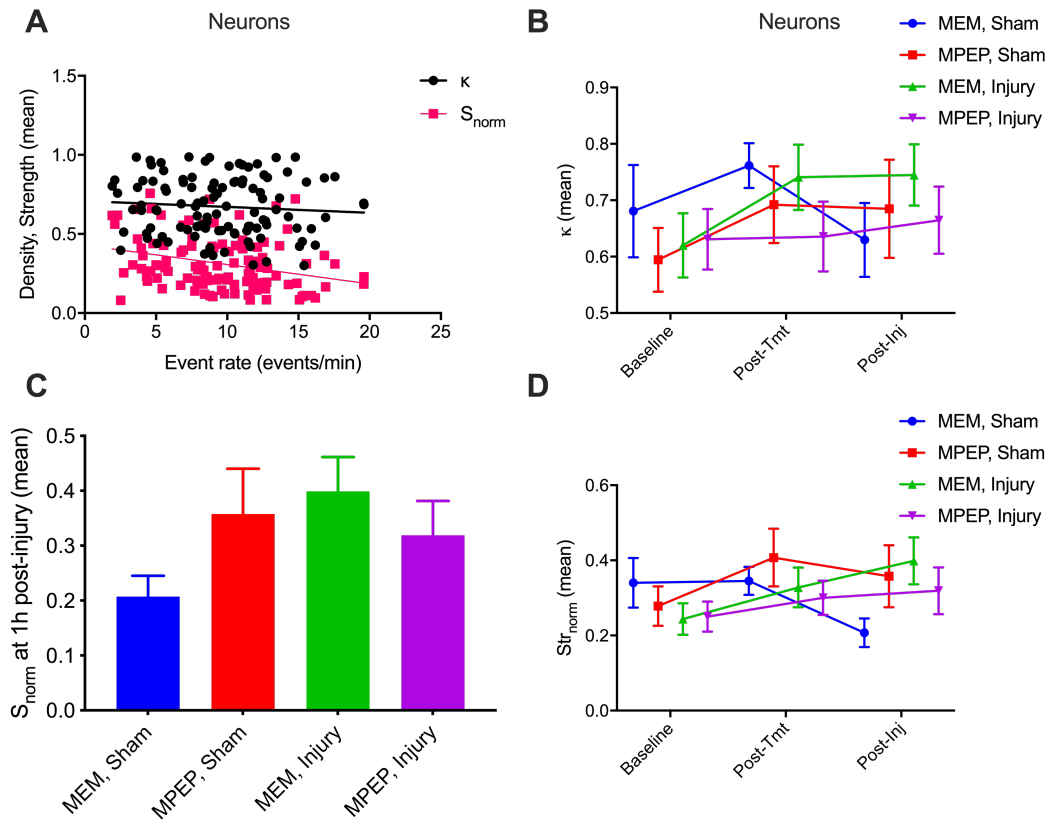

351 **Supplementary Figure 5.** Effect of exogenous manipulations on neuron network edge density and nodal strength. **A.** Neuron-neuron network mean edge  
 352 density (black) and mean normalized nodal strength (magenta) versus event rate for all dishes at all experimental time points (simple linear regressions:  $\kappa$ ,  
 353 95% CI of slope [-0.01256, 0.005102],  $F(1,106) = 0.7007$ ,  $R^2 = 0.006567$ ,  $p = 0.4044$ ;  $S$ , 95% CI of slope [-0.01996, -0.004531],  $F(1,106) = 9.902$ ,  $R^2$   
 354 = 0.08543,  $p = 0.0021$ ). **B.** Neuron-neuron network edge density at each experimental time point for each experimental group. **C.** Mean normalized nodal  
 355 strength for all experimental groups at the final time point, 1 hour post-injury. The differences between groups were not significant (ordinary one-way ANOVA,  
 356  $p = 0.1782$ ). **D.** Mean normalized nodal strength for all experimental groups at all experimental time points. Error bars indicate standard error of the mean  
 357 (SEM) and asterisks indicate statistical significance (no asterisks, ns,  $*p \leq 0.05$ ,  $**p \leq 0.01$ ,  $***p \leq 0.001$ ,  $****p \leq 0.0001$ ). Tmt: treatment; MEM: treated  
 358 with minimum essential media; MPEP: treated with anti-mGluR<sub>5</sub>; Injury: subjected to targeted neuronal tap injury; Sham: negative injury control.

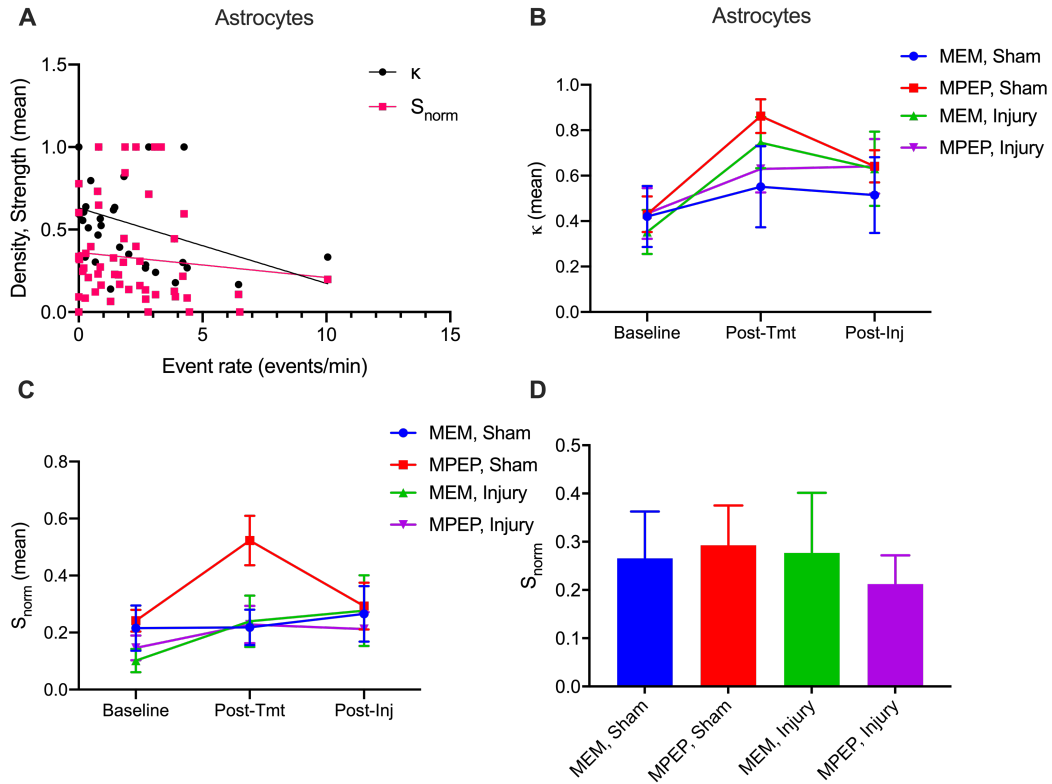

359 **Supplementary Figure 6.** Effect of exogenous manipulations on astrocyte network edge density and nodal strength. **A.** Astrocyte-astrocyte network mean  
 360 edge density (black) and mean normalized nodal strength (magenta) versus event rate for all dishes at all experimental time points (simple linear regressions:  $\kappa$ ,  
 361 95% CI of slope [-0.07971, -0.01170],  $F(1,73) = 7.174$ ,  $R^2 = 0.08948$ ,  $p = 0.0091$ ;  $S$ , 95% CI of slope [-0.04667, 0.01627],  $F(1,73) = 0.9267$ ,  $R^2 = 0.01254$ ,  
 362  $p = 0.3389$ ). **B.** Astrocyte-astrocyte network edge density at each experimental time point for each experimental group. **C.** Mean normalized nodal strength  
 363 for all experimental groups at the final time point, 1 hour post-injury. The differences between groups were not significant (ordinary one-way ANOVA,  $p =$   
 364 0.9221). **D.** Mean normalized nodal strength for all experimental groups at all experimental time points. Error bars indicate standard error of the mean (SEM)  
 365 and asterisks indicate statistical significance (no asterisks, ns, \* $p \leq 0.05$ , \*\* $p \leq 0.01$ , \*\*\* $p \leq 0.001$ , \*\*\*\* $p \leq 0.0001$ ). Tmt: treatment; MEM: treated with  
 366 minimum essential media; MPEP: treated with anti-mGluR<sub>5</sub>; Injury: subjected to targeted neuronal tap injury; Sham: negative injury control.



|             | <i>C</i> |          |          | <i>B</i> |          |          | <i>E</i> |          |          |
|-------------|----------|----------|----------|----------|----------|----------|----------|----------|----------|
|             | $\beta$  | <i>z</i> | <i>p</i> | $\beta$  | <i>z</i> | <i>p</i> | $\beta$  | <i>z</i> | <i>p</i> |
| Intercept   | 0.0815*  | 5.783    | 0.000    | 0.0237*  | 5.482    | 0.000    | 0.1116*  | 11.023   | 0.000    |
| Strength    | 0.9306*  | 35.137   | 0.000    | -0.0316* | -3.883   | 0.000    | 0.8970*  | 47.144   | 0.000    |
| MPEP        | 0.0099   | 0.761    | 0.446    | 0.0025   | 0.620    | 0.535    | 0.0042   | 0.452    | 0.652    |
| Sham        | -0.0346* | -2.450   | 0.014    | -0.0020  | -0.471   | 0.638    | *-0.0224 | -2.207   | 0.027    |
| MPEP + Sham | 0.0270   | 1.372    | 0.170    | 0.0033   | 0.542    | 0.588    | 0.0174   | 1.234    | 0.217    |

367 **Supplementary Table 3.** Results of generalized linear regression to predict the effect of group assignment on mean clustering coefficient (*C*), mean  
368 normalized betweenness centrality (*B*), and global efficiency (*E*) for **neuron** networks at the final experimental timepoint.  $\beta$ : estimated coefficient, *z*: value of  
369 test statistic for coefficient, the value of the estimate divided by the standard error of the estimate, and *p*: p-value for coefficient resulting from a t-test,  $\text{pr}( > z )$ ,  
370 *df* = 31. The *z*-test tests the null hypothesis that the coefficient for that covariate is equal to zero. Asterisks indicate statistical significance ( $p < 0.05$ ). In this  
371 case, only changes in *C* and *E* were significantly predicted by injury alone (see effect of Sham).

|             | <i>C</i> |          |          | <i>B</i> |          |          | <i>E</i> |          |          |
|-------------|----------|----------|----------|----------|----------|----------|----------|----------|----------|
|             | $\beta$  | <i>z</i> | <i>p</i> | $\beta$  | <i>z</i> | <i>p</i> | $\beta$  | <i>z</i> | <i>p</i> |
| Intercept   | *0.1383  | 3.611    | 0.000    | 0.1057*  | 4.563    | 0.000    | 0.0844*  | 2.128    | 0.033    |
| Strength    | 1.0433*  | 15.711   | 0.000    | -0.1741* | -4.335   | 0.000    | 1.1275*  | 16.392   | 0.000    |
| MPEP        | -0.0355  | -0.936   | 0.350    | -0.0237  | -1.033   | 0.302    | -0.0229  | -0.584   | 0.559    |
| Sham        | -0.0015  | -0.037   | 0.917    | 0.0082   | 0.336    | 0.737    | 0.0089   | 0.212    | 0.832    |
| MPEP + Sham | -0.0359  | -0.653   | 0.514    | 0.0166   | 0.499    | 0.618    | -0.0334  | -0.587   | 0.557    |

372 **Supplementary Table 4.** Results of generalized linear regression to predict the effect of group assignment on mean clustering coefficient (*C*), mean  
373 normalized betweenness centrality (*B*), and global efficiency (*E*) for **astrocyte** networks at the final experimental time point.  $\beta$ : estimated coefficient, *z*:  
374 value of test statistic for coefficient, the value of the estimate divided by the standard error of the estimate, and *p*: p-value for coefficient resulting from a t-test,  
375  $\text{pr}(> z)$ ,  $df = 17$ . The *z*-test tests the null hypothesis that the coefficient for that covariate is equal to zero. In this case, no topological parameters could be  
376 significantly predicted by treatment condition.

|             | <i>C</i> |          |          | <i>B</i> |          |          | <i>E</i> |          |          |
|-------------|----------|----------|----------|----------|----------|----------|----------|----------|----------|
|             | $\beta$  | <i>z</i> | <i>p</i> | $\beta$  | <i>z</i> | <i>p</i> | $\beta$  | <i>z</i> | <i>p</i> |
| Intercept   | 0.1105*  | 7.908    | 0.000    | 0.0195*  | 4.446    | 0.000    | 0.1252*  | 9.461    | 0.000    |
| Strength    | 0.8564*  | 29.945   | 0.000    | -0.0262* | -2.926   | 0.003    | 0.8457*  | 31.211   | 0.000    |
| MPEP        | -0.0056  | -0.424   | 0.672    | 0.0032   | 0.767    | 0.443    | -0.0017  | -0.134   | 0.894    |
| Sham        | -0.0368* | -2.473   | 0.013    | -0.0008  | -0.162   | 0.871    | -0.0208  | -1.474   | 0.141    |
| MPEP + Sham | 0.0359   | 1.717    | 0.086    | -0.0008  | -0.117   | 0.907    | 0.0196   | 0.991    | 0.321    |

377 **Supplementary Table 5.** Results of generalized linear regression to predict the effect of group assignment on mean clustering coefficient (*C*), mean  
378 normalized betweenness centrality (*B*), and global efficiency (*E*) for **multilayer** networks at the final experimental timepoint.  $\beta$ : estimated coefficient, *z*:  
379 value of test statistic for coefficient, the value of the estimate divided by the standard error of the estimate, and *p*: p-value for coefficient resulting from a t-test,  
380  $\text{pr}(> z)$ ,  $df = 22$ . The *z*-test tests the null hypothesis that the coefficient for that covariate is equal to zero. In this case, only changes in *C* were significantly  
381 predicted by injury alone (see effect of Sham).

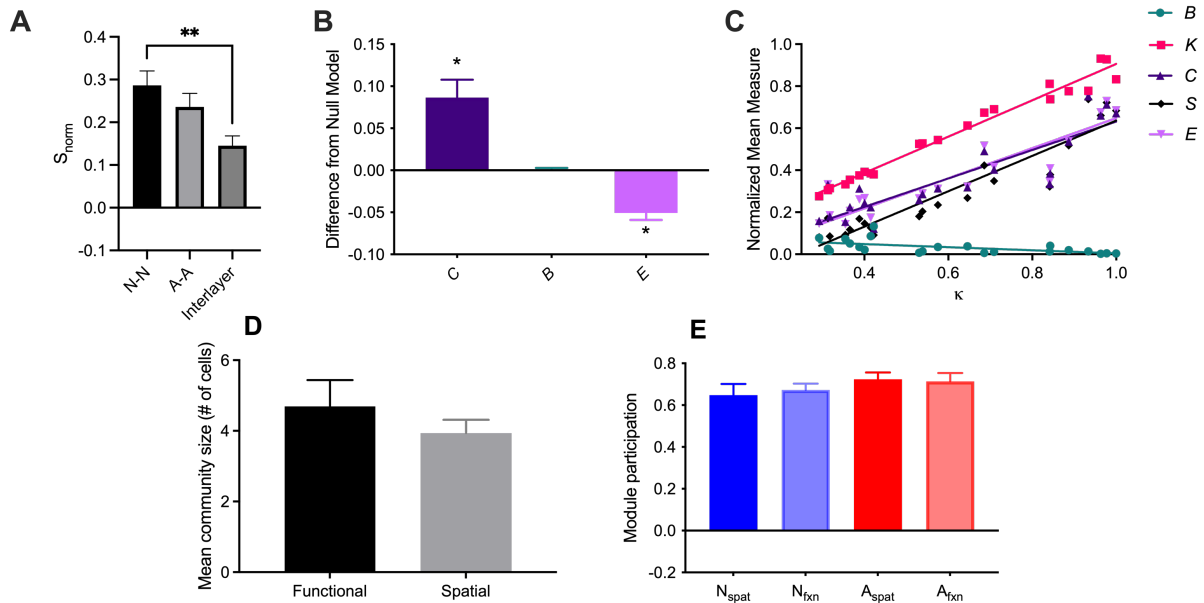

382 **Supplementary Figure 7.** Characterization of sub-sampled multilayer neuron-astrocyte functional and spatial network topology. Neurons were randomly  
 383 sub-sampled so that the number of neurons and astrocyte microdomains was equal. **A.** Mean normalized strength of neuron layer, astrocyte layer, interlayer,  
 384 and multilayer connections of sub-sampled multilayer networks (Tukey’s multiple comparisons test following one-way ANOVA, N-N vs. N-A,  $q = 4.729$ ,  
 385  $df = 63$ ,  $p = 0.0039$ ). **B.** Difference from random null model of calculated mean clustering coefficient  $C$ , normalized betweenness centrality  $B$ , and global  
 386 efficiency  $E$ . We observe significantly larger clustering coefficients (one sample  $t$ -test,  $t = 4.103$ ,  $df = 21$ ,  $p = 0.0005$ ) and significantly lower global efficiency  
 387 (one sample  $t$ -test,  $t = 6.089$ ,  $df = 21$ ,  $p < 0.0001$ ) than expected from a random null model with preserved degree distribution. **C.** Mean clustering coefficient  
 388  $C$ , normalized betweenness centrality  $B$ , normalized degree  $K$ , normalized strength  $S_{norm}$ , and global efficiency  $E$  vs. mean density  $\kappa$  for each dish at the  
 389 third imaging time point (1 hour post-injury). We observe clear positive correlations as assessed by a linear regression for  $K$ ,  $S_{norm}$ ,  $C$ , and  $E$ , and a clear  
 390 negative correlation for  $B$  (Table S 6). **D.** Mean community size for functional and spatial communities in sub-sampled multilayer networks networks (paired  
 391  $t$  - test,  $t = 0.8896$ ,  $df = 22$ ,  $p = 0.3833$ ). **E** Average module participation, the fraction of modules that contain at least one of that cell type, as determined  
 392 based on spatial distance and functional connectivity for both randomly sub-sampled neurons and astrocytes (differences between groups are not statistically  
 393 significant; ordinary one-way ANOVA,  $F(3, 88) = 0.7745$ ,  $p = 0.5113$ ).

|                 | $B$                | $C$              | $E$              |
|-----------------|--------------------|------------------|------------------|
| 95% CI of slope | [-0.1256,-0.02158] | [0.5094, 0.8444] | [0.5523, 0.8805] |
| $R^2$           | 0.3034             | 0.7803           | 0.8057           |
| $F$             | 8.709              | 71.05            | 82.94            |
| $DF$            | 20                 | 20               | 20               |
| $p$             | 0.0079             | <0.0001          | <0.0001          |

394 **Supplementary Table 6.** Results of simple linear regression of  $B$ ,  $C$ , and  $E$  on network density  $\kappa$  for sub-sampled multilayer networks at the final  
 395 experimental time point.

|             | <i>C</i> |          |          | <i>B</i> |          |          | <i>E</i> |          |          |
|-------------|----------|----------|----------|----------|----------|----------|----------|----------|----------|
|             | $\beta$  | <i>z</i> | <i>p</i> | $\beta$  | <i>z</i> | <i>p</i> | $\beta$  | <i>z</i> | <i>p</i> |
| Intercept   | 0.1589*  | 4.702    | 0.000    | 0.0376*  | 1.979    | 0.048    | 0.1192*  | 5.709    | 0.000    |
| Strength    | 0.7010*  | 10.003   | 0.000    | -0.0641  | -1.627   | 0.104    | 0.8120*  | 18.758   | 0.000    |
| MPEP        | 0.0528   | 1.800    | 0.072    | 0.0177   | 1.074    | 0.283    | 0.0068   | 0.378    | 0.705    |
| Sham        | -0.0047  | -0.151   | 0.888    | 0.0204   | 1.166    | 0.244    | -0.0194  | -1.011   | 0.312    |
| MPEP + Sham | 0.0229   | 0.509    | 0.611    | -0.0270  | -1.069   | 0.285    | 0.0164   | 0.589    | 0.556    |

396 **Supplementary Table 7.** Results of generalized linear regression to predict the effect of group assignment on mean clustering coefficient (*C*), mean  
397 normalized betweenness centrality (*B*), and global efficiency (*E*) for **sub-sampled multilayer** networks at the final experimental timepoint.  $\beta$ : estimated  
398 coefficient, *z*: value of test statistic for coefficient, the value of the estimate divided by the standard error of the estimate, and *p*: p-value for coefficient resulting  
399 from a t-test,  $\text{pr}(> z)$ ,  $df = 17$ . The *z*-test tests the null hypothesis that the coefficient for that covariate is equal to zero. In this case, no topological measures  
400 were significantly affected by MPEP, injury, or their interaction.

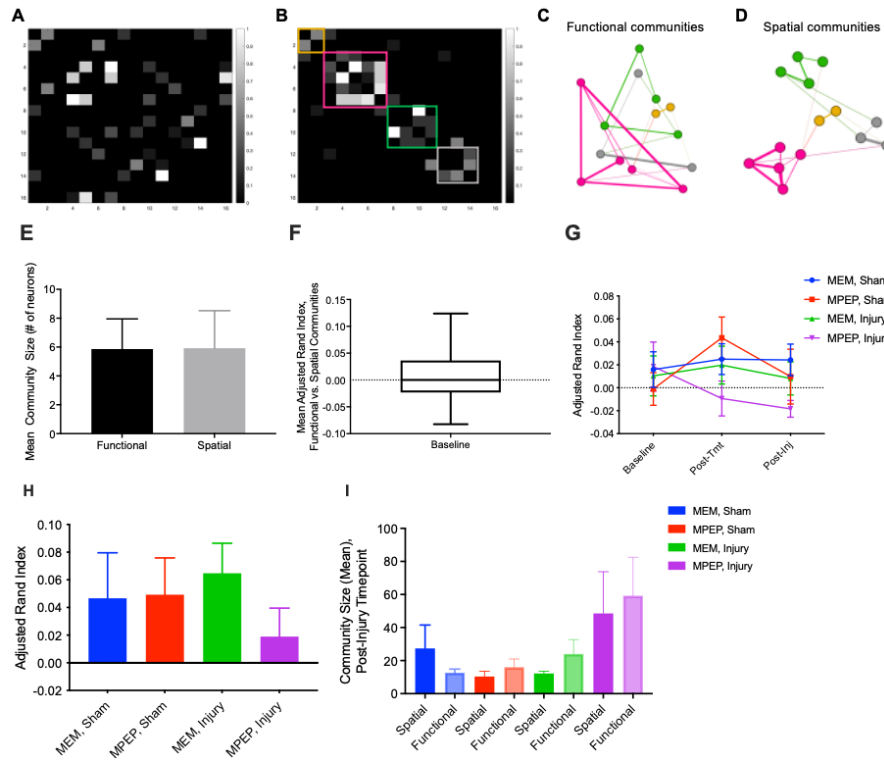

401 **Supplementary Figure 8.** Community structure of *in vitro* multilayer networks. **A.** Representative adjacency matrix of a neuronal network. **B.** The same  
402 adjacency matrix shown in panel **a** after community detection, reordered with modules grouped along the diagonal. **C.** Graph of the network shown in panel **A**  
403 and panel **B** depicting modularity as determined by functional connectivity between nodes. Nodes of the same color belong to the same functional community.  
404 **C.** Graph of the network shown in panel **A** and panel **B** depicting modularity as determined by spatial proximity between nodes. Nodes of the same color  
405 belong to the same spatial community. If functional connectivity were based on spatial proximity, the modules in panels **C** and **D** would be the same or similar.  
406 **E.** Number of functional (black) and spatial (gray) communities detected in neuron networks (paired *t*-test,  $t=0.01640$ ,  $df=35$ ,  $p = 0.9870$ ). **F.** Mean Adjusted  
407 Rand Index for functionally- versus spatially-generated neuron-neuron networks. Whiskers range from the minimum value to the maximum value (95% CI of  
408 mean [-0.004606, 0.03082]). **G.** Adjusted Rand Index for functionally- versus spatially-generated neuron-neuron networks at the three measured time points  
409 for all four treatment groups (two-way ANOVA, time factor,  $F(2, 96) = 0.7336$ ,  $p=0.4828$ ; treatment factor,  $F(3, 96) = 1.404$ ,  $p = 0.2463$ ; interaction term,  $F(6,$   
410  $96) = 0.9866$ ,  $p=0.4388$ ). **H.** Mean adjusted Rand Index for functionally- vs. spatially-generated multilayer networks for the four experimental conditions  
411 at the third time point. **I.** Number of spatial (solid) and functional (shaded) communities detected in multilayer networks at the third time point. Error bars  
412 indicate standard error of the mean (SEM) and asterisks indicate statistical significance (no asterisks, ns, \* $p \leq 0.05$ . \*\* $p \leq 0.01$ . \*\*\* $p \leq 0.001$ , \*\*\*\* $p \leq$   
413  $0.0001$ ). MEM: treated with minimum essential media; MPEP: treated with anti-mGluR<sub>5</sub>; Injury: subjected to targeted neuronal tap injury; Sham: negative  
414 injury control.

| <b>A. Neuron-Neuron</b> |                  |                   |                 |                  |
|-------------------------|------------------|-------------------|-----------------|------------------|
|                         | <b>MEM, Sham</b> | <b>MPEP, Sham</b> | <b>MEM, Inj</b> | <b>MPEP, Inj</b> |
| <b>95% CI of slope</b>  | [0.117, 0.539]   | [0.24, 0.734]     | [0.128, 0.381]  | [-0.214, 0.029]  |
| <b>R<sup>2</sup></b>    | 0.267            | 0.229             | 0.377           | 0.08             |
| <b>F</b>                | 10.17            | 8.301             | 16.91           | 2.437            |
| <b>DF</b>               | 28               | 28                | 28              | 28               |
| <b>p</b>                | 0.0035           | 0.0075            | 0.0003          | 0.1300           |

  

| <b>B. Astrocyte-Astrocyte</b> |                  |                   |                 |                  |
|-------------------------------|------------------|-------------------|-----------------|------------------|
|                               | <b>MEM, Sham</b> | <b>MPEP, Sham</b> | <b>MEM, Inj</b> | <b>MPEP, Inj</b> |
| <b>95% CI of slope</b>        | [-0.755, 0.990]  | [0.875, 1.933]    | [0.610, 1.455]  | [0.244, 1.134]   |
| <b>R<sup>2</sup></b>          | 0.003            | 0.534             | 0.482           | 0.264            |
| <b>F</b>                      | 0.0772           | 29.78             | 25.13           | 10.06            |
| <b>DF</b>                     | 24               | 26                | 27              | 28               |
| <b>p</b>                      | 7.84E-01         | 1.01E-05          | 2.94E-05        | 0.0366           |

  

| <b>C. Neuron-Astrocyte</b> |                  |                   |                  |                  |
|----------------------------|------------------|-------------------|------------------|------------------|
|                            | <b>MEM, Sham</b> | <b>MPEP, Sham</b> | <b>MEM, Inj</b>  | <b>MPEP, Inj</b> |
| <b>95% CI of slope</b>     | [0.179, 0.70]    | [-0.663, 0.122]   | [-0.871, -0.202] | [0.319, 0.801]   |
| <b>R<sup>2</sup></b>       | 0.326            | 0.069             | 0.286            | 0.457            |
| <b>F</b>                   | 12.09            | 1.995             | 10.83            | 22.75            |
| <b>DF</b>                  | 25               | 27                | 27               | 27               |
| <b>p</b>                   | 0.00187          | 0.169             | 0.0228           | 5.66E-05         |

415 **Supplementary Table 8.** Results of linear regressions to predict functional connection probability (see Methods) from spatial connectivity for each experi-  
 416 mental group at the final experimental time point (1 hour post-injury). Reported are the 95% confidence interval on the slope, the  $R^2$  value,  $F$ -statistic, degrees  
 417 of freedom ( $DF$ ), and the  $p$ -value on the  $F$ -statistic for neuron-neuron networks (**A**), astrocyte-astrocyte networks (**B**) and multilayer networks (**C**). See Fig.  
 418 ??.



| <b>A. Neuron-Neuron</b> |                  |                   |                 |                  |
|-------------------------|------------------|-------------------|-----------------|------------------|
|                         | <b>MEM, Sham</b> | <b>MPEP, Sham</b> | <b>MEM, Inj</b> | <b>MPEP, Inj</b> |
| <b>95% CI of slope</b>  | [0.011, 0.082]   | [0.112, 0.174]    | [0.204, 0.286]  | [0.128, 0.163]   |
| <b>R<sup>2</sup></b>    | 0                | 0.006             | 0.01            | 0.001            |
| <b>F</b>                | 6.687            | 80.88             | 140.4           | 18.17            |
| <b>DF</b>               | 15,086           | 14,159            | 14,001          | 22,879           |
| <b>p</b>                | 0.00972          | 2.69E-19          | 3.12E-32        | 2.03E-05         |

  

| <b>B. Astrocyte-Astrocyte</b> |                  |                   |                 |                  |
|-------------------------------|------------------|-------------------|-----------------|------------------|
|                               | <b>MEM, Sham</b> | <b>MPEP, Sham</b> | <b>MEM, Inj</b> | <b>MPEP, Inj</b> |
| <b>95% CI of slope</b>        | [0.691, 1.485]   | [-.250, -0.005]   | [0.652, 0.942]  | [-0.066, 0.141]  |
| <b>R<sup>2</sup></b>          | 0.075            | 0.002             | 0.096           | 0                |
| <b>F</b>                      | 29.07            | 4.185             | 129.4           | 0.4987           |
| <b>DF</b>                     | 359              | 1,674             | 1,221           | 2,197            |
| <b>p</b>                      | 1.27E-07         | 0.0409            | 1.45E-28        | 0.48             |

  

| <b>C. Neuron-Astrocyte</b> |                  |                   |                 |                  |
|----------------------------|------------------|-------------------|-----------------|------------------|
|                            | <b>MEM, Sham</b> | <b>MPEP, Sham</b> | <b>MEM, Inj</b> | <b>MPEP, Inj</b> |
| <b>95% CI of slope</b>     | [-0.191, -0.002] | [0.003, 0.091]    | [0.142, 0.305]  | [-0.042, 0.034]  |
| <b>R<sup>2</sup></b>       | 0.001            | 0.001             | 0.007           | 0                |
| <b>F</b>                   | 4.019            | 4.358             | 28.97           | 0.03981          |
| <b>DF</b>                  | 3,792            | 7,009             | 4,417           | 11,344           |
| <b>p</b>                   | 0.0451           | 0.0369            | 7.75E-08        | 0.842            |

419 **Supplementary Table 9.** Results of linear regressions to predict functional edge weight from spatial edge weight for each experimental group at the final  
 420 experimental time point (1 hour post-injury, see Table S3). Reported are the 95% confidence interval on the slope, the  $R^2$  value,  $F$ -statistic, degrees of freedom  
 421 ( $DF$ ), and the  $p$ -value on the  $F$ -statistic for neuron-neuron networks (A), astrocyte-astrocyte networks (B) and multilayer networks (C). See Fig. 13.

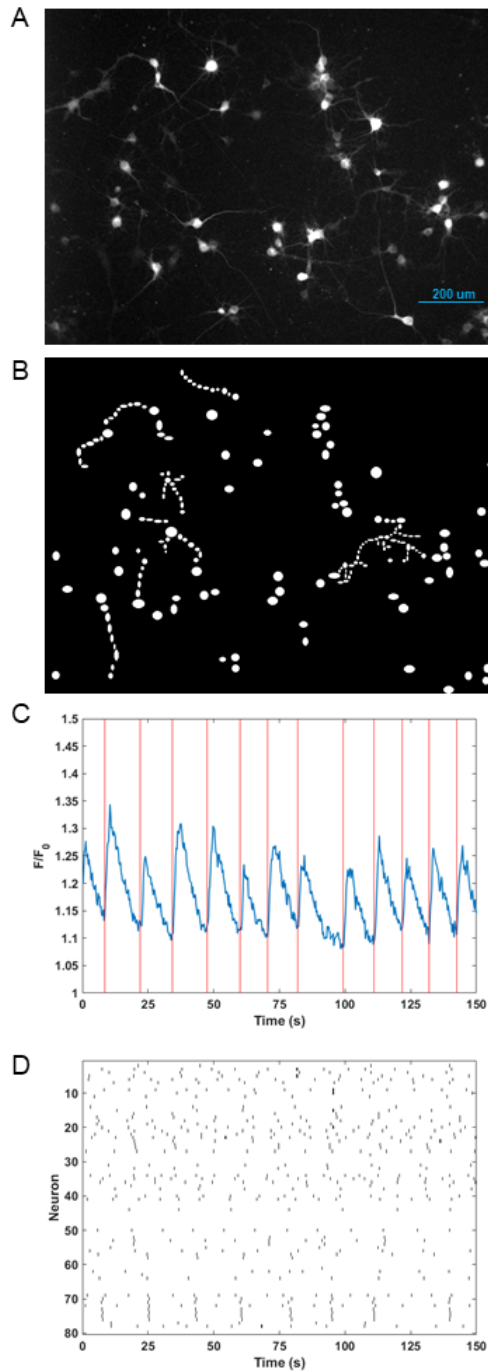

422 **Supplementary Figure 9.** *In vitro* calcium image acquisition and processing of neuron-astrocyte networks. **A.** Maximum fluorescence projection of the  
 423 video recording. **B.** Manually identified ROIs segmenting neurons and astrocytes segments. **C.** Scaled fluorescence trace for a single neuronal ROI (blue), with  
 424 detected spikes overlaid (vertical red lines). **D.** Raster plot of spikes over time, with each black vertical line indicating one spike, of all neuronal ROIs in the  
 425 field of view.

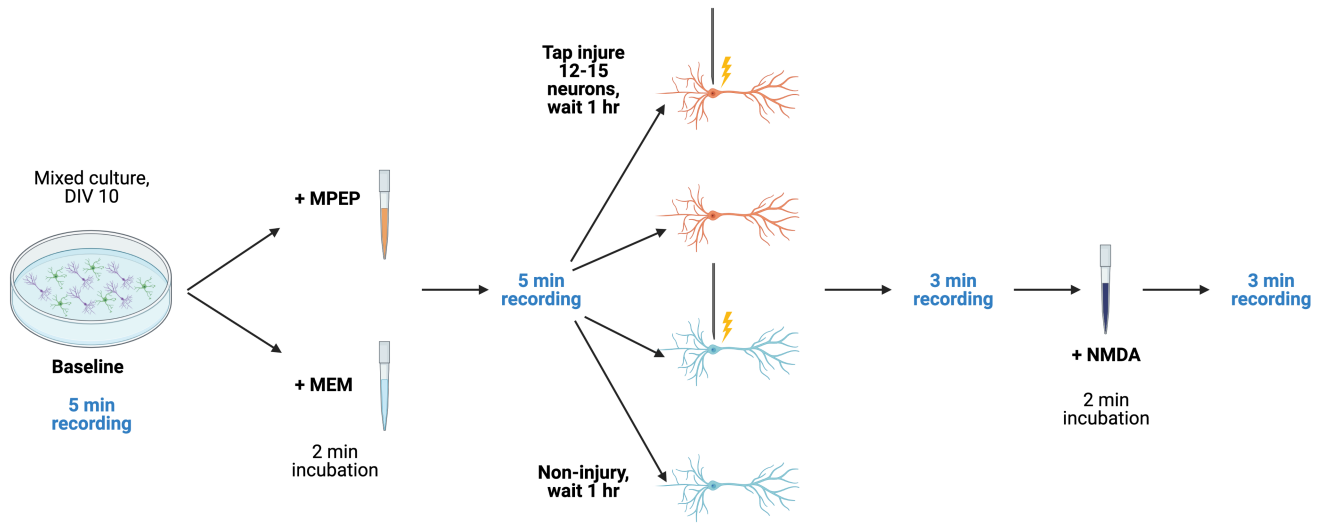

426 **Supplementary Figure 10.** Experimental design and treatment protocol (n = 8-9 dishes in each arm). All experiments were performed in mixed neuron  
 427 (purple cells) and astrocyte (green cells) cultures at 10 days *in vitro* (DIV 10). Following a two-three minute equilibration period, five minutes of baseline  
 428 calcium activity was recorded. 1uM MPEP HCl (orange) or MEM (light blue) was added, and five minutes of calcium activity was imaged following a two-  
 429 minute incubation period. In half of the dishes, 12-15 neurons were mechanically injured via tap (indicated by yellow lightening bolt) with a pulled glass  
 430 micropipette tip (black) controlled by a micro-manipulator (not shown). Three minutes of activity was imaged one hour later, followed by three minutes of  
 431 imaging after addition of 100uM NMDA to differentiate neurons and astrocytes (see Methods). Renderings were created using Biorendering and are not to  
 432 scale.

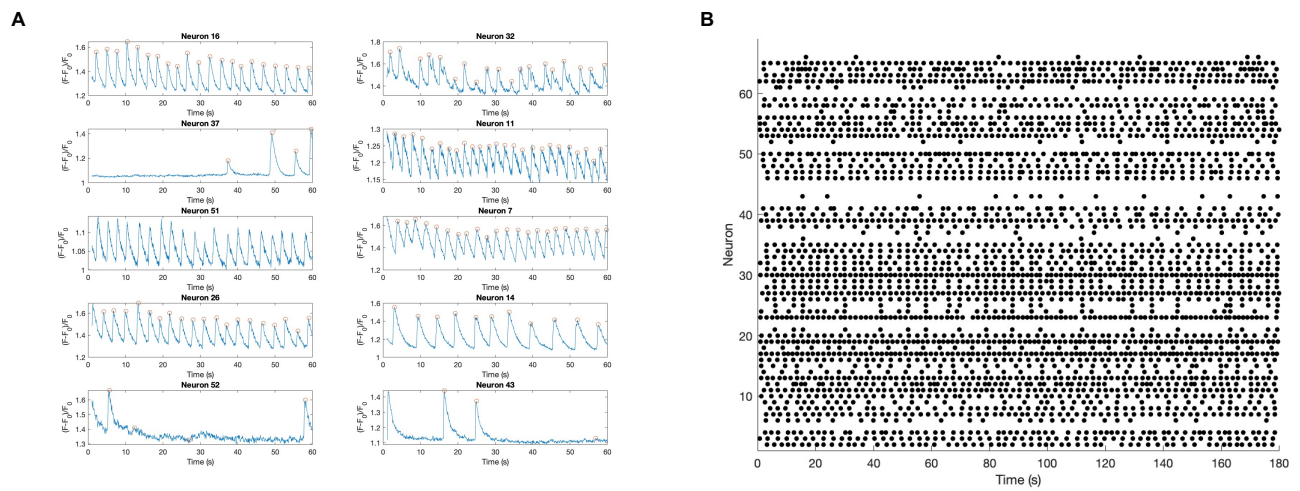

433 **Supplementary Figure 11.** Spike inference from neuronal calcium activity. **A.** Scaled calcium fluorescence traces of 10 randomly selected neurons from a  
 434 representative dish, with detected spikes (red open circles) overlaid. Activity is shown for the first minute of baseline recording. **B.** Raster plot showing spikes  
 435 over time for each neuron in the dish in **A** at baseline (entire recording). We note the absence of bursting activity characteristic of autaptic cultures.

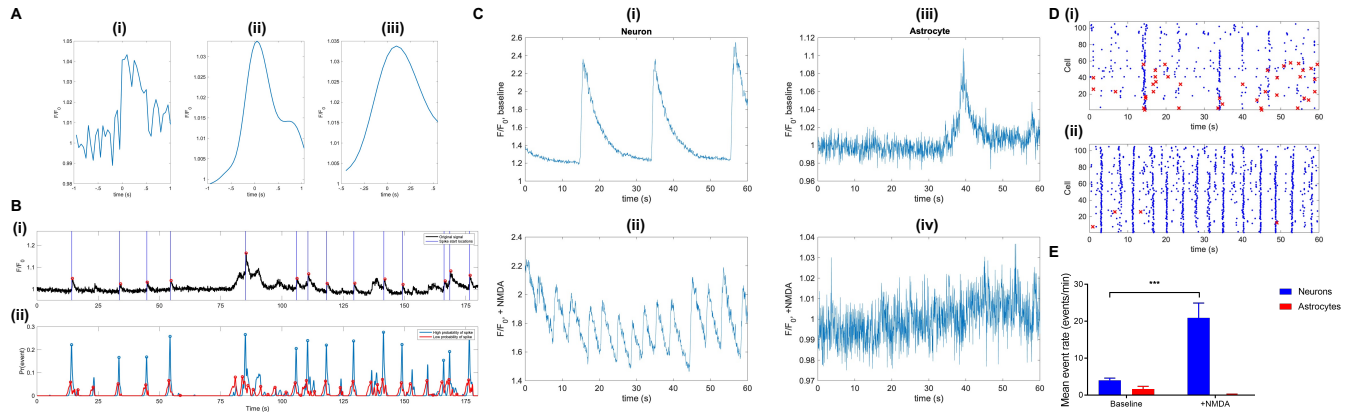

436 **Supplementary Figure 12.** Event inference from astrocyte calcium activity **A.** Processing of unfiltered astrocyte segment fluorescence data to generate a  
 437 library waveform. **(i)** Unfiltered snippet of calcium activity around a peak. **(ii)** Filtered snippet of the same peak. **(iii)** Shortened snippet cropped to contain a  
 438 single peak with shortened decay time, 75% of original duration. **B.** Predicted spikes generated by the automated astrocyte calcium event detection algorithm  
 439 for an example astrocyte trace. **(i)** Scaled fluorescence of the astrocyte ROI with detected baseline (blue line) and peak (red circle) locations overlaid. **(ii)** High  
 440 (red) and low (blue) probabilities of an event for the same trace, with detected peaks overlaid. The probability signals are used to determine event location.  
 441 SNR = 1.7611. **C.** Scaled fluorescence and frequency of transients is higher after addition of NMDA in neurons but not astrocytes. Scaled fluorescence of a  
 442 neuron before **(i)** and after **(ii)** addition of 100uM NMDA + 10uM glycine coagonist. Scaled fluorescence of an astrocyte before **(iii)** and after **(iv)** addition of  
 443 NMDA. The astrocyte has fewer events after addition of NMDA. **D.** Raster plot showing population-level neuronal spiking (blue dots) and astrocytic calcium  
 444 event (red crosses) activity before **(i)** and after **(ii)** addition of NMDA. Neuronal, but not astrocytic, population activity is visibly increased after the addition  
 445 of NMDA. **E.** Mean neuronal (blue) and astrocytic (red) event rates at baseline (left) and following addition of 100uM NMDA + 1uM glycine coagonist (right).  
 446 Addition of NMDA led to a significant increase in the number of events per minute for neurons (Sidak's multiple comparisons test;  $p = 0.0003$ ,  $t = 4.932$ ,  $df =$   
 447 8), but not astrocytes (Sidak's multiple comparisons test;  $p = 0.8165$ ,  $t = 0.5897$ ,  $df = 8$ ).

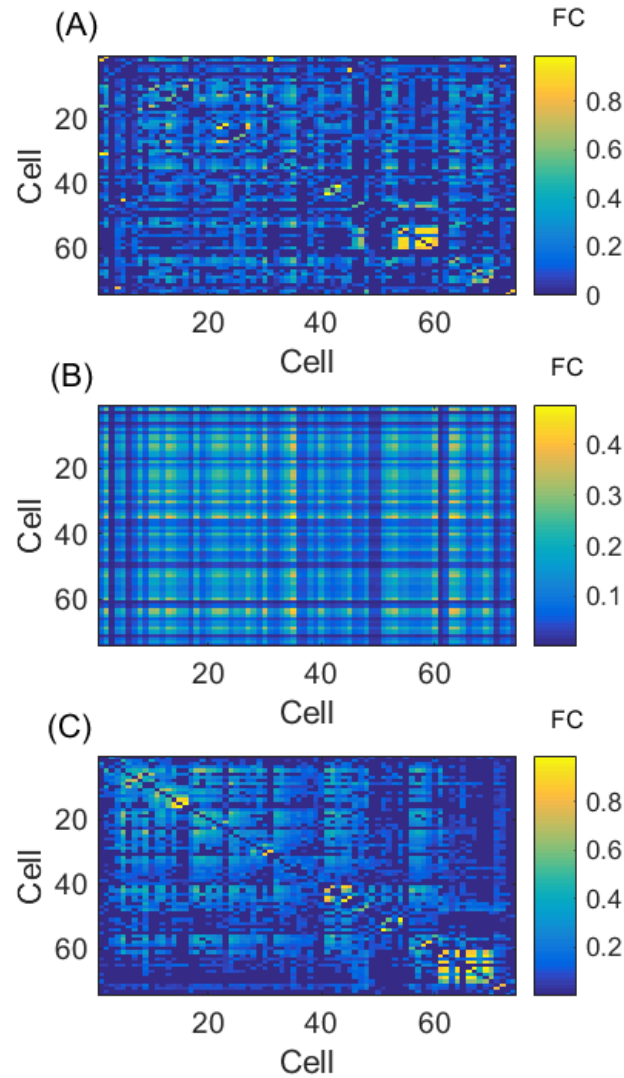

448 **Supplementary Figure 13.** Community detection in a multilayer functional network. **A.** Adjacency matrix of neurons and astrocyte segments based on  
 449 functional connectivity. **B.** Girvan-Newman null adjacency matrix for panel **A.** **C.** Adjacency matrix from panel **A** reordered by modular structure, so that  
 450 nodes in the same module are adjacent.
